# Supplementary material for: Magnetically nanorized seaweed residue for the adsorption of methylene blue in aqueous solutions
Source: Royal Society of Chemistry journal article supplement (doi:10.1039/d4ra04416a), 2024-01-01
Supplement: d4ra04416a1.pdf [file d4ra04416a1.pdf]

## Electronic Supplementary Information for

### **Magnetically nanorized seaweed residue for the adsorption of methylene blue in aqueous solutions**

Xinyi Yang,<sup>‡a</sup> Jingjing Liu,<sup>‡a</sup> Xuejin Huang,<sup>a</sup> Hemin Cui,<sup>c</sup> Ligang Wei,<sup>\*a</sup> Guolin Shao,<sup>a</sup>

Xu Fu,<sup>\*a,b</sup> Na liu,<sup>a</sup> Qingda An<sup>a,b</sup> and Shangru Zhai<sup>a,b</sup>

<sup>a</sup> *School of Light Industry and Chemical Engineering, Dalian Polytechnic University, Dalian 116034, China*

<sup>b</sup> *Liaoning Key Lab of Lignocellulose Chemistry and BioMaterials, Liaoning Collaborative Innovation Center for Lignocellulosic Biorefinery, Dalian Polytechnic University, Dalian Polytechnic University, Dalian 116034, China*

<sup>c</sup> *Dalian Zhonghuida Scientific Instrument Co. LTD., Dalian 116023, China*

---

\* Corresponding author. Tel: +86 0411 86323726. Email address: weilg@dlpu.edu.cn (L. Wei); fuxumail@163.com (X. Fu).

‡ These authors contributed equally to this paper.

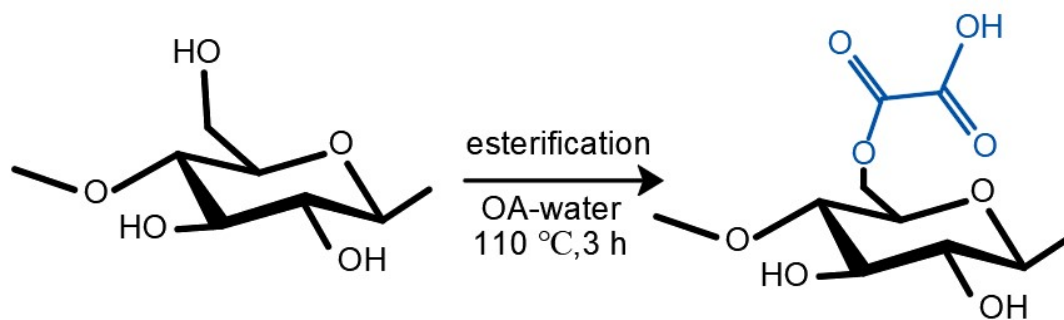

**Scheme S1** Carboxylic functions of SR cellulose in the OA-water pretreatment.

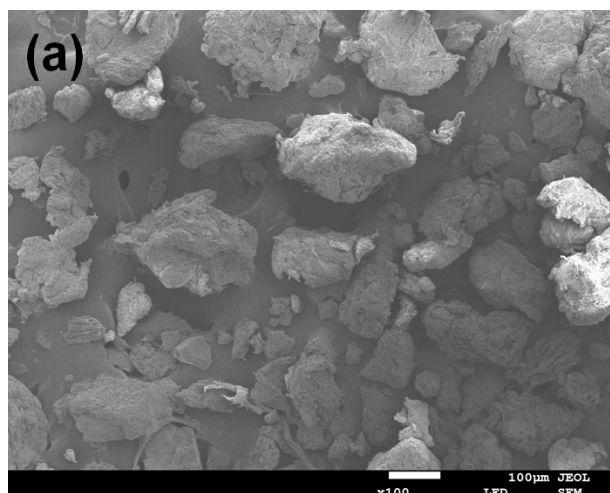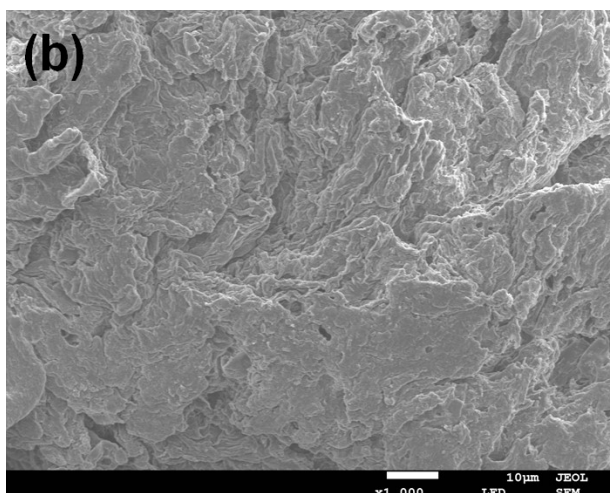

**Fig. S1** SEM images of SR.

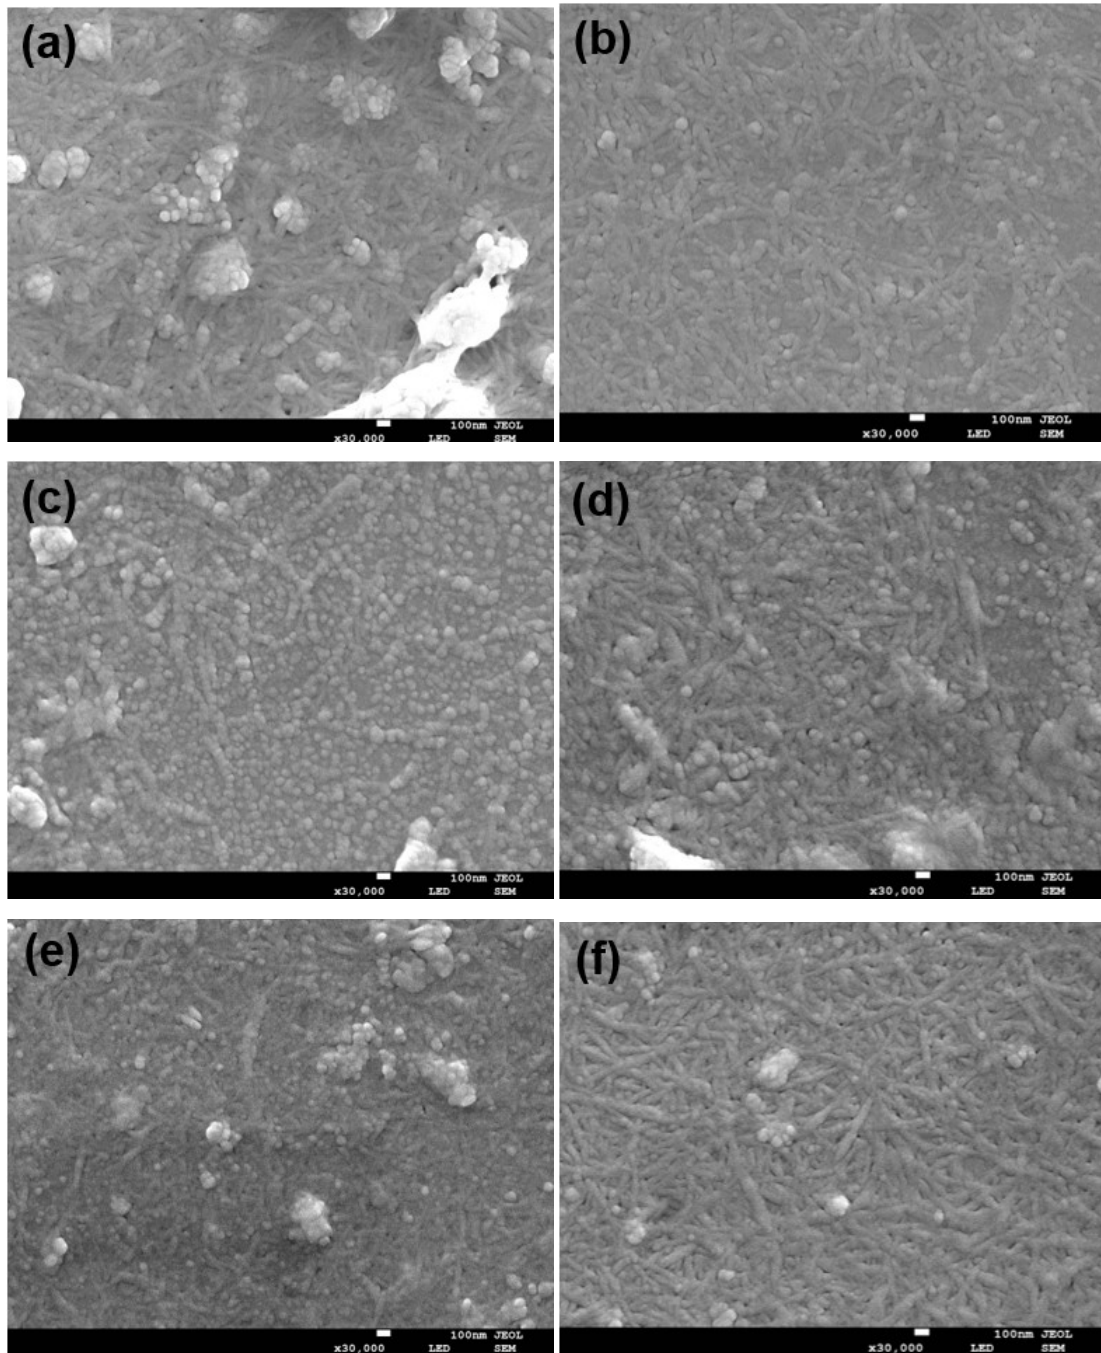

**Fig. S2** SEM images of prepared NSR samples. NSR10 (a), NSR20(b), NSR30(c), NSR40(d), NSR50(e), NSR60(f).

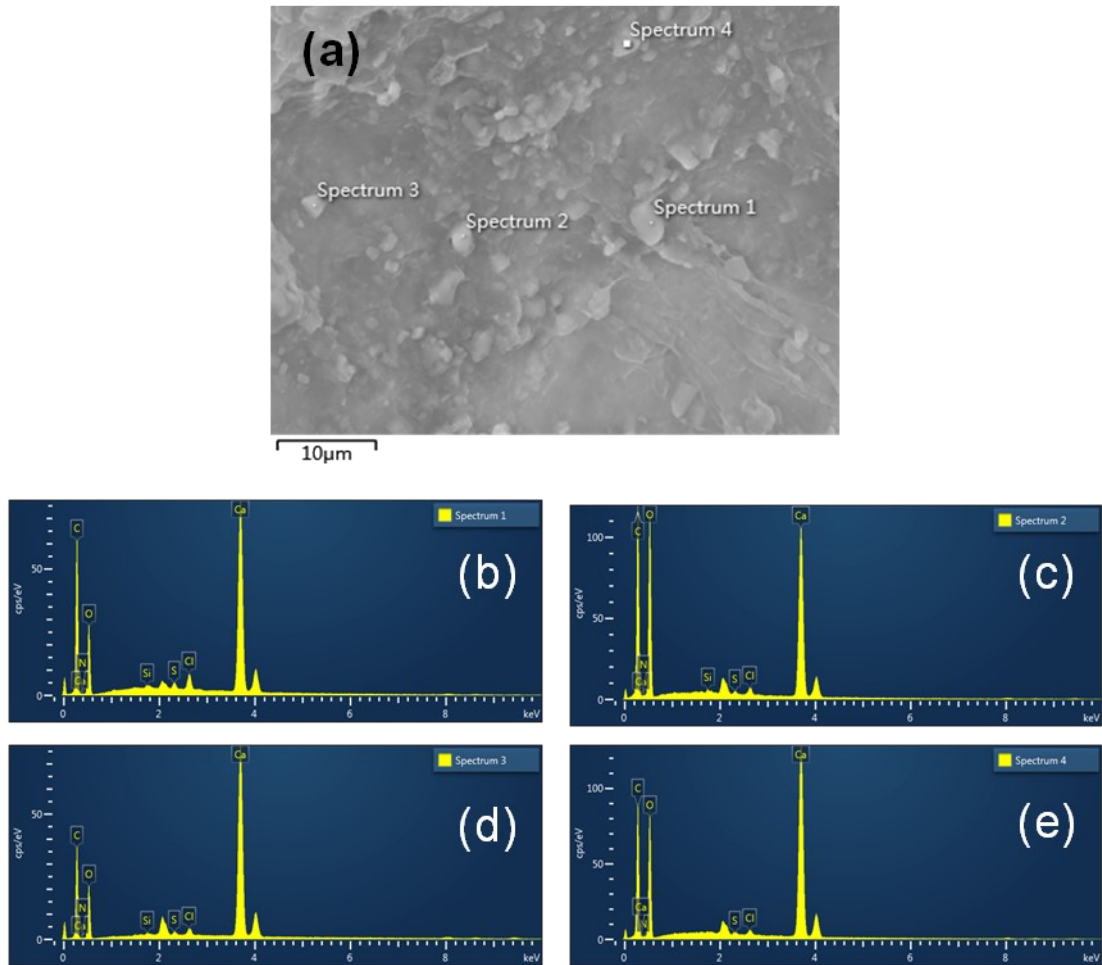

**Fig. S3** SEM images of NSR samples (a) and EDS spectra (b-e)

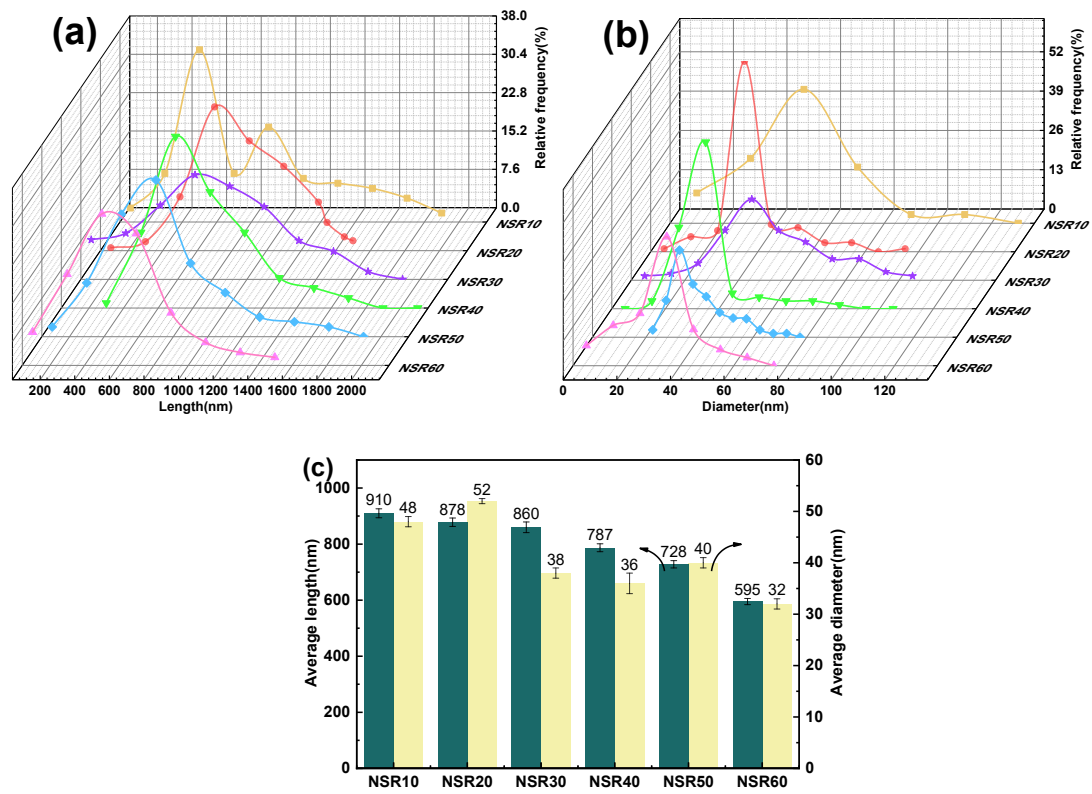

**Fig. S4** Size distributions of the prepared NSR-NC samples: length (a); diameter (b); and average length and diameter (c).

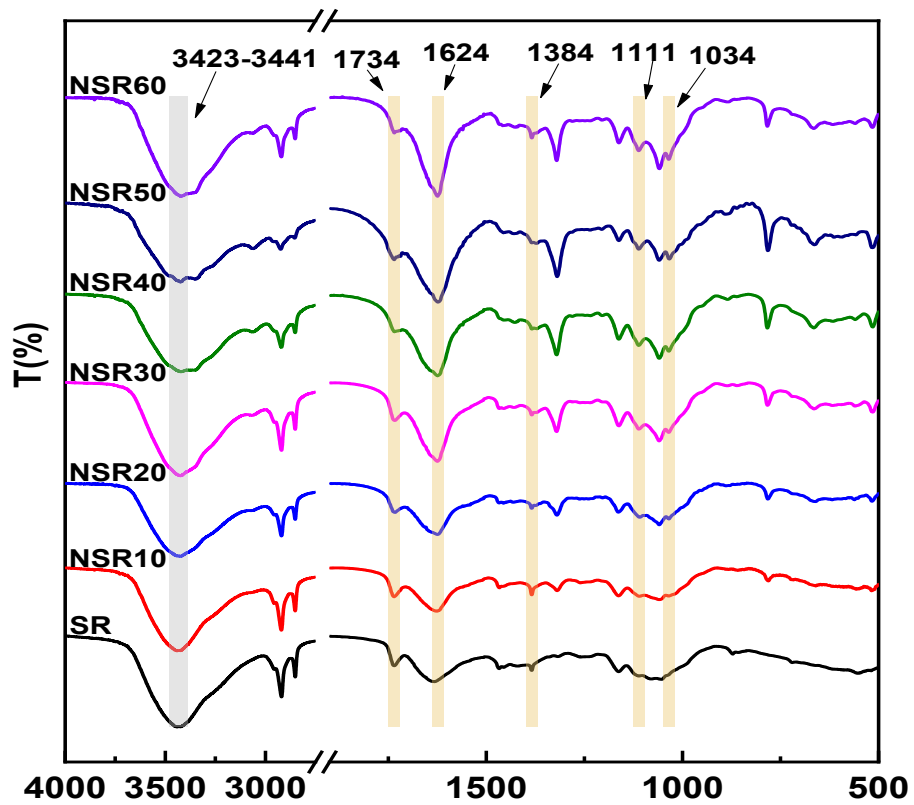

Fig. S5 FTIR spectra of SR and prepared NSRs.

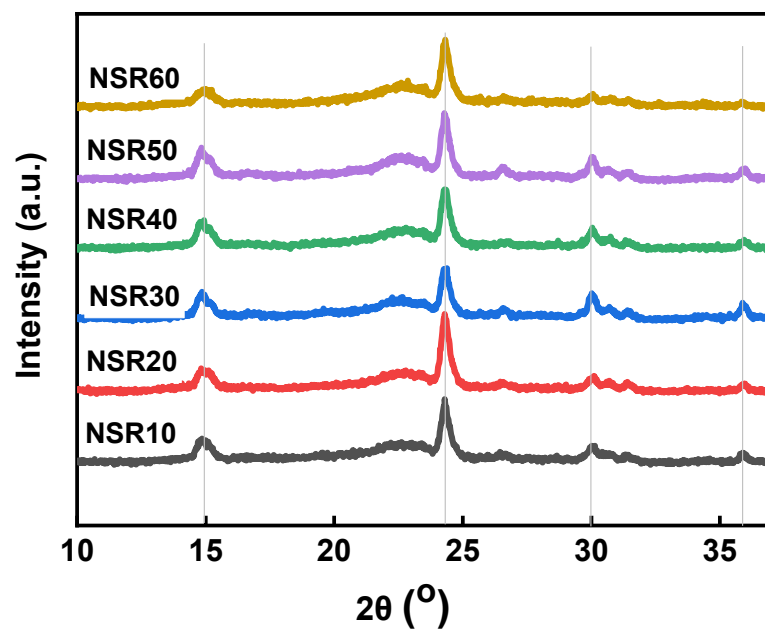

Fig. S6 XRD patterns of prepared NSRs.



**Table S1** Properties of SR and prepared NSRs.

| sample | S <sub>BET</sub> (m <sup>2</sup> /g) | carboxyl group content (mmol/g) |
|--------|--------------------------------------|---------------------------------|
| SR     | 36.91                                | 1.79±0.04                       |
| NSR10  | 57.60                                | 4.58±0.13                       |
| NSR20  | 48.89                                | 4.74±0.21                       |
| NSR30  | 43.54                                | 4.96±0.19                       |
| NSR40  | 62.03                                | 6.01±0.26                       |
| NSR50  | 58.84                                | 6.26±0.29                       |
| NSR60  | 57.38                                | 6.73±0.38                       |

**Table S2** Residual rate of Fe<sub>3</sub>O<sub>4</sub> NPs during preparing magnetic composites and density of surface charge of used NC materials.

| sample | residual rate of Fe <sub>3</sub> O <sub>4</sub> NPs(%) | density of surface charge (μeq/g) |
|--------|--------------------------------------------------------|-----------------------------------|
| NC-1   | 18.9±0.7                                               | -13±2                             |
| NC-2   | 46.3±2.4                                               | -42 ±5                            |
| NSR-SA | 8.5±0.5                                                | -87±3                             |
| NSR20  | 1.4±0.2                                                | -350±12                           |

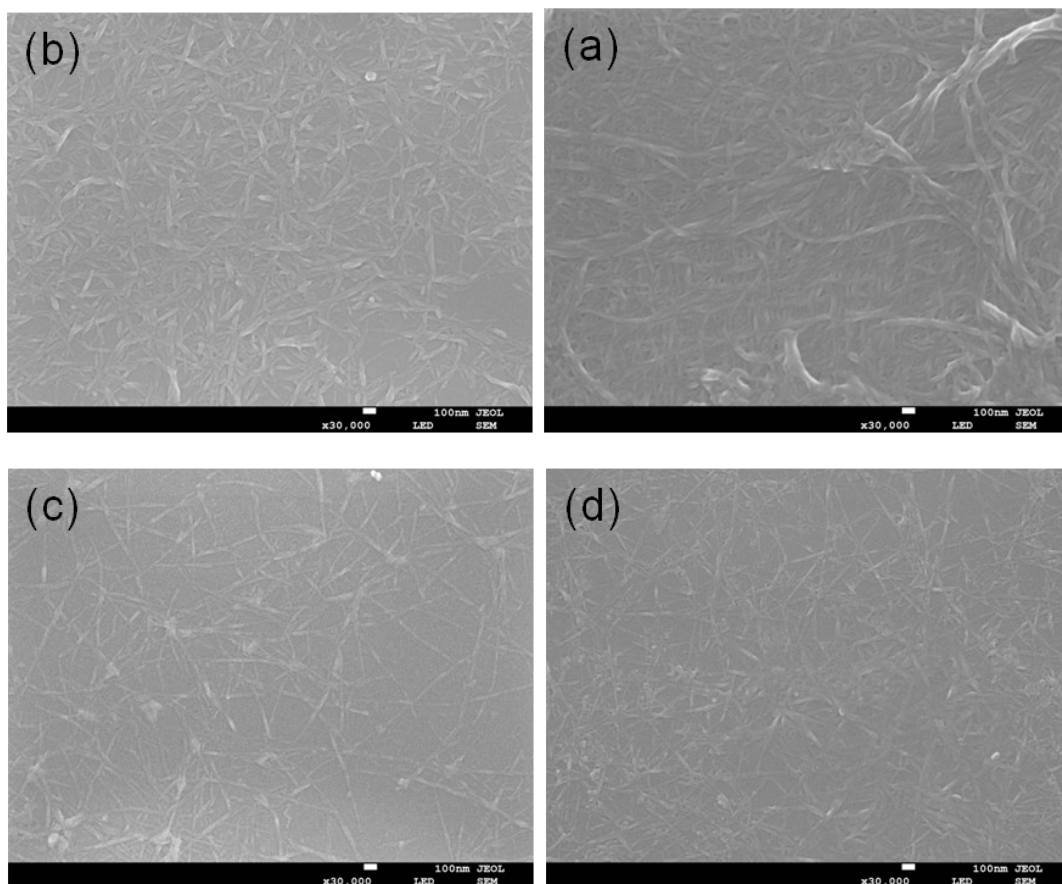

**Fig. S7** SEM images of NC-1(a), NC-2(b), NSR-SA(c), and NSR20 (d).

**Table S3** Comparison of MNSR1/1 with other adsorbents for MB dye.

| Adsorbents                                                                                                    | Recycle times/RE(%) | $q_{\max}$ (mg/g) | Ref       |
|---------------------------------------------------------------------------------------------------------------|---------------------|-------------------|-----------|
| Ni (OH) <sub>2</sub> /polyacrylamide composite                                                                | 5/90.91             | 14.3              | [S1]      |
| cationic poly (styrene sulfonate)-incorporated anionic chitosan beads                                         | 3/47.20             | 42.21             | [S2]      |
| Bacterial cellulose and expanded vermiculite composite                                                        | -/-                 | 92.16             | [S3]      |
| cellulose/polyvinyl alcohol /expanded graphite 3D porous foam                                                 | 5/71.93             | 110.81            | [S4]      |
| UiO-66-NH <sub>2</sub> functionalized with an ionic polymer poly (2-acrylamido-2-methylpropane sulfonic acid) | -/-                 | 120.34            | [S5]      |
| polyaniline/zeolite-A composite                                                                               | -/-                 | 270.9             | [S6]      |
| The activated carbons obtained by chemical activation with potassium carbonate                                | -/-                 | 296               | [S7]      |
| MNSR1/1                                                                                                       | 5/82.71             | 184.25            | this work |

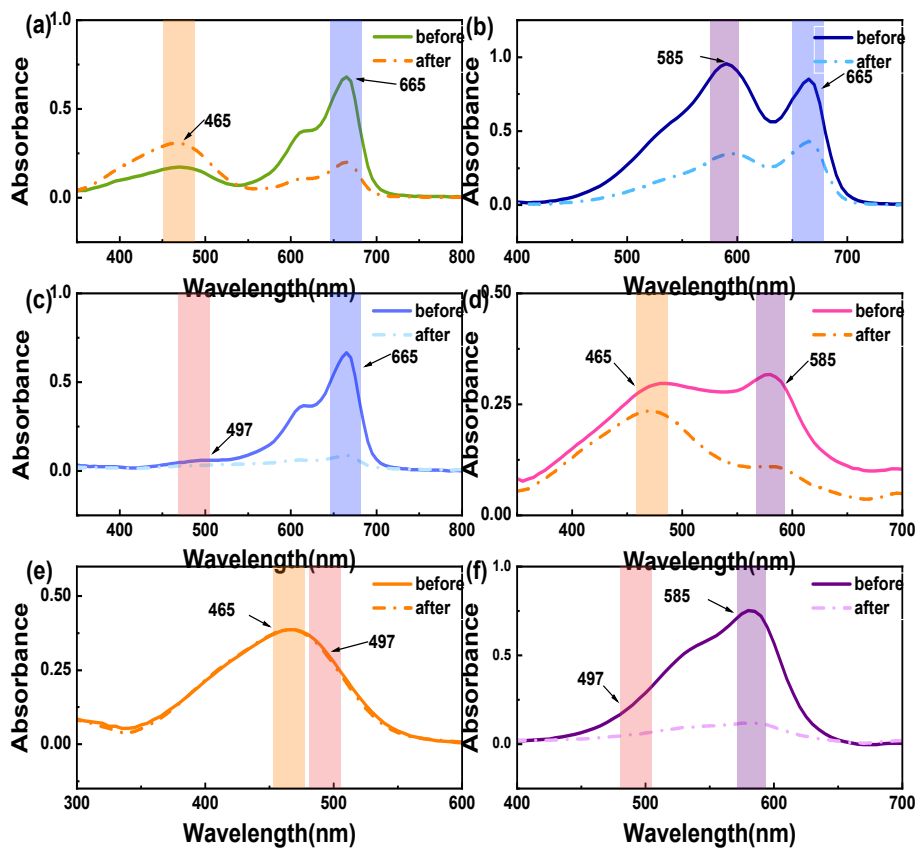

**Fig. S8** The UV full-spectra of MB+MO (a), MB+MV (b), MB+CR (c), MO+MV (d), MO+CR (e) and MV+CR (f) dyes mixture in the selective adsorption of MNSR1/1.

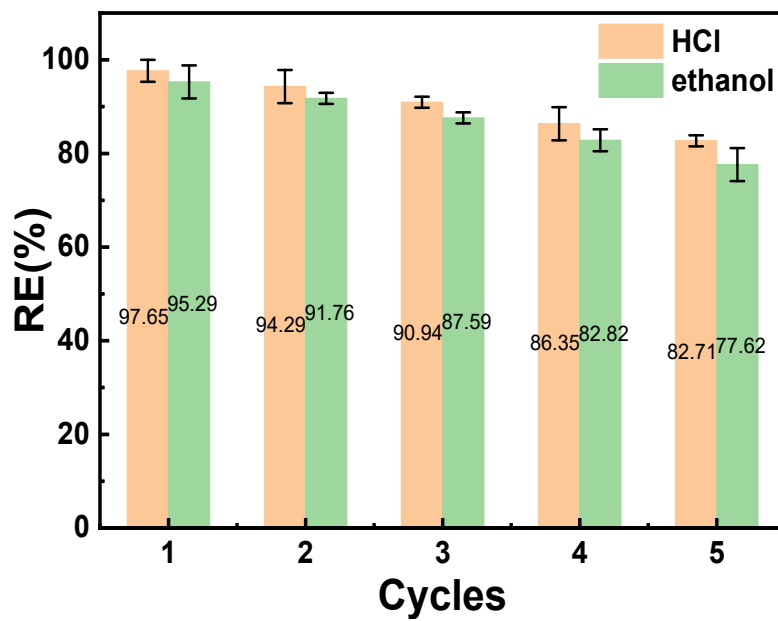

Fig. S9 Recycled experiments of MNSR1/1.

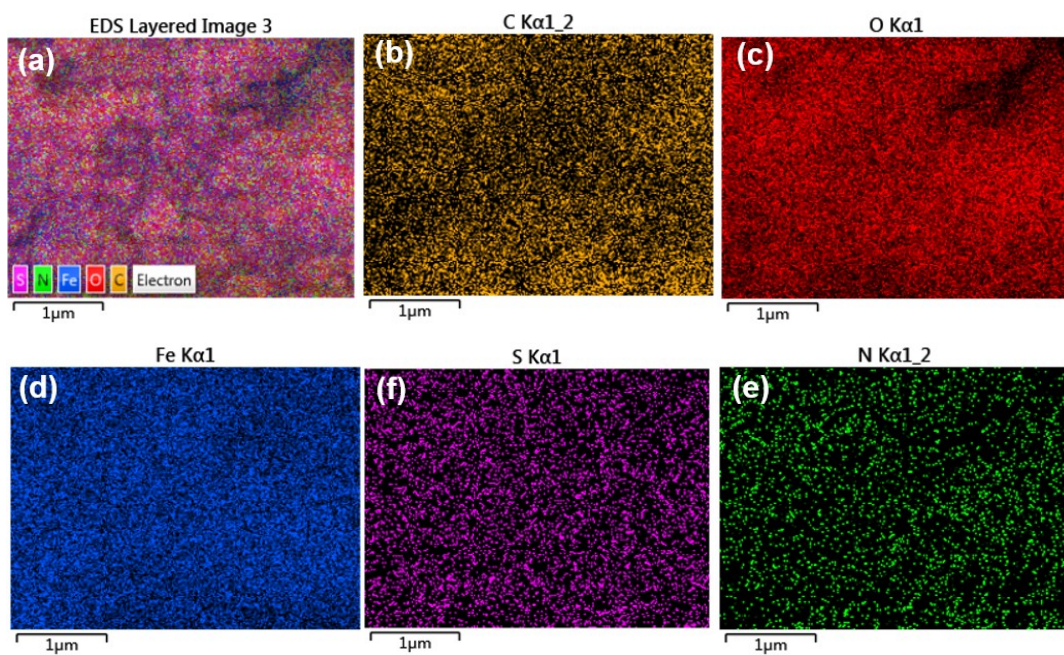

**Fig. S10** Elemental mappings of layered image (a), C (b), O (c), N(d), Fe(e), S (f), N (e) in MNSR1/1.

## References.

- S1. A. Marey, M. Adel, A. M. A. E. Naggar, A. A. El-Zahhar and M. H. T. Taha, *Dalton Trans.*, 2023, **52**, 14194-14209.
- S2. K. S. Lau, N. A. S. Azmi, S. X. Chin, S. Zakaria and C. H. Chia. *Polymers*, 2023, **15**, 1269.
- S3. X. Bai, Z. Liu, P. Liu, Y. Zhang, L. Hu and T. Su, *Polymers*, 2023, **15**, 2342.
- S4. X. Tan, Q. Peng, T. Subrova, J. Saskova, J. Wiener, M. Venkataraman, J. Militky, W. Xiong, J. Xu A. R. Mahendran and H. Lammer, *J. Nat. Fibers*, 2023, **20**, 2190189.
- S5. H. Fan, Z. Zhang, Y. Chen, Z. Wang, H. Wen, S. Tian, S. Chen, H. Zhao, Y. He and Y. Wang, *Dalton Trans.*, 2023, **52**, 5028-5033.
- S6. A. T. Zaidalkilani, A. M. Farhan, I. R. Sayed, A. M. El-Sherbeeney, W. A. Zoubi, A. Al-Farga and M. R. Abukhadra. *Molecules*, 2023, **28**, 7168.
- S7. D. Paluch, A. Bazan-Wozniak, A. Nosal-Wiercińska and R. Pietrzak. *Molecules*, 2023, **28**, 6306.
